# Supplementary material
Source: Springer Nature journal article supplement (https://www.springermedizin.de/resource/supplementary/12943_2009_588_MOESM6_ESM.pdf/9555040)

**A**Control  
MA10  
MA50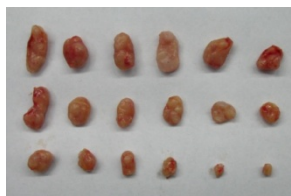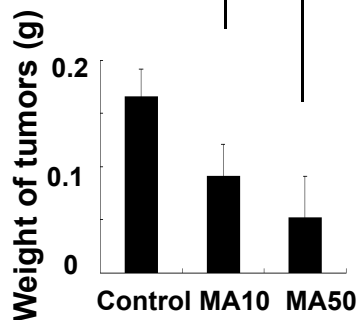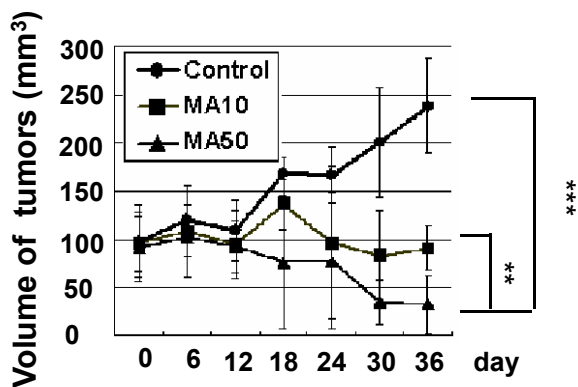**B**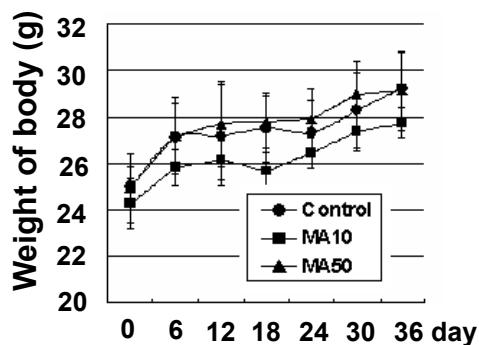**D**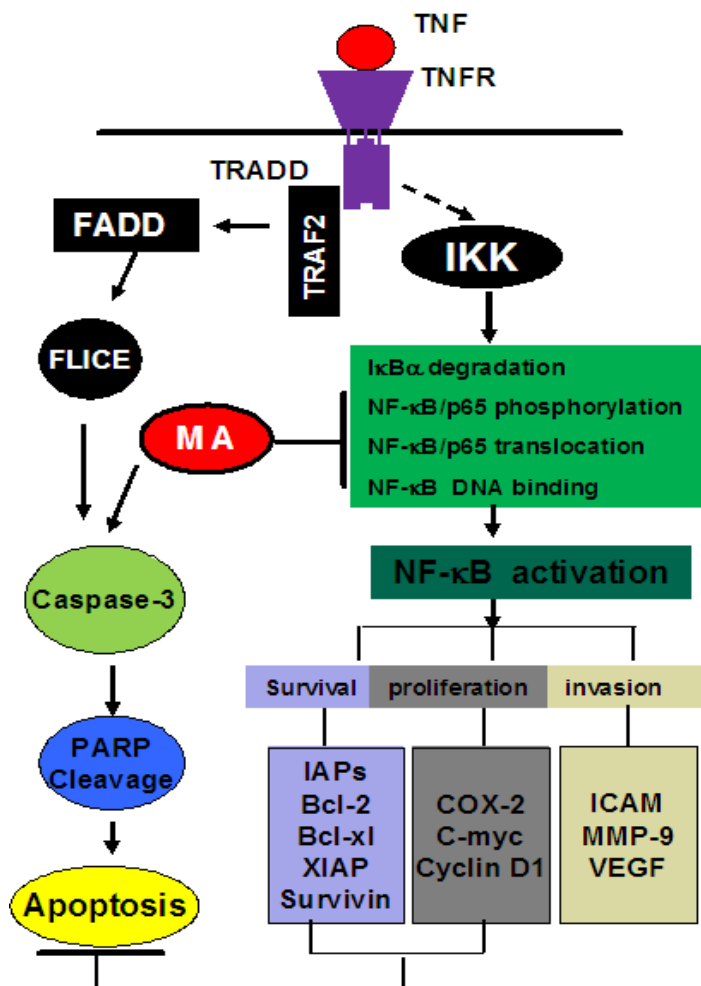**C**

Control

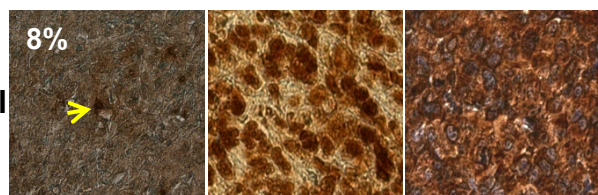

MA10

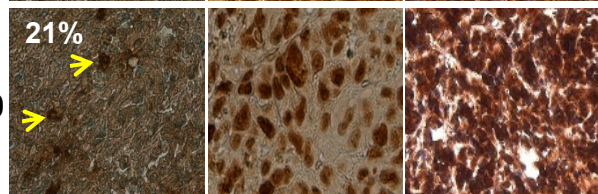

MA50

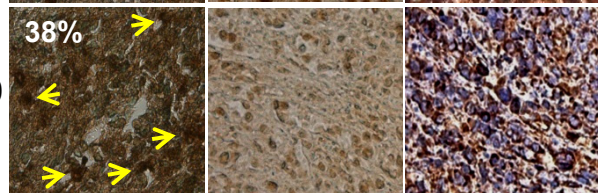TUNEL  
10XSurvivin  
10XBcl-x1  
10X

Supplement: MOESM6 [file 9555040]
